# Supplementary material
Source: Springer Nature journal article supplement (https://www.springermedizin.de/resource/supplementary/12914_2008_60_MOESM2_ESM.pdf/9537488)
Supplement: MOESM2 [file 9537488]

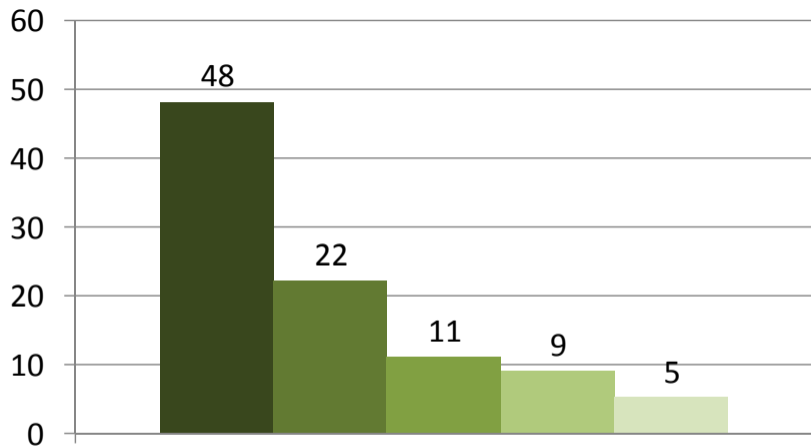

■ Do a Surgical Procedure

■ Medication Change

■ Clinic Referral

■ Cancel Planned Surgical Procedure

■ Further Radiology

Change in management in 43% (103 of 242) of patients
